# Supplementary material for: Cluster correlation based method for lncRNA-disease association prediction
Source: PubMed Central journal article supplement (PMC7216352; doi:10.1186/s12859-020-3496-8), 2020-05-11
Supplement: 12859_2020_3496_MOESM1_ESM.pdf [file 12859_2020_3496_MOESM1_ESM.pdf]

Table S1. Summary of some valuable lncRNA-disease association prediction models.

| <b>NAME (DATE)</b>   | <b>PUBMED ID</b> | <b>METHOD</b>                                                                             | <b>DATASETS</b>                                                                                                                                                           | <b>CASE STUDIES</b>                                                |
|----------------------|------------------|-------------------------------------------------------------------------------------------|---------------------------------------------------------------------------------------------------------------------------------------------------------------------------|--------------------------------------------------------------------|
| LRLSLDA (2013)       | 24002109         | Laplacian Regularized Least Square in the semi-supervised learning framework              | disease-lncRNA associations, lncRNA expression profiles                                                                                                                   | Alzheimer's disease<br>bladder cancer<br>melanoma<br>breast cancer |
| LNCSSIM (2015)       | 26061969         | Laplacian Regularized Least Square, Similarity scores                                     | lncRNA-disease associations, disease semantic similarity                                                                                                                  | colorectal cancer<br>lung cancer                                   |
| LDAP (2017)          | 28172495         | Bagging SVM classifier                                                                    | lncRNA-disease associations, PPI, lncRNA sequence, GO                                                                                                                     | breast cancer                                                      |
| RWRlncD (2014)       | 24850297         | Random walk With restart on an lncRNA-lncRNA functional similarity network                | lncRNA-disease association, disease similarity, gene functional similarity                                                                                                | prostate cancer<br>Alzheimer's disease                             |
| IRWRLDA (2015)       | 27517318         | Random Walk with Restart on a heterogeneous network                                       | lncRNA-disease associations, lncRNA expression profiles, lncRNA functional similarity, disease semantic similarity, lncRNA Gaussian interaction profile kernel similarity | colon cancer<br>leukemia                                           |
| Yang's method (2014) | 24498199         | propagation algorithm on a coding-non-coding gene-disease bipartite network               | gene-disease associations                                                                                                                                                 | Alzheimer's disease<br>pancreatic cancer<br>gastric cancer         |
| KATZLDA (2015)       | 26577439         | KATZ measure, heterogeneous network                                                       | lncRNA-disease associations, lncRNA expression profiles, lncRNA functional similarity, disease semantic similarity, Gaussian interaction profile kernel similarity        | colon<br>gastric<br>renal cancer                                   |
| Liu's method (2014)  | 24392133         | tissue specificity scores calculation, Spearman's correlation coefficients, co-expression | human lncRNA expression profiles, gene expression profiles, human disease-associated gene data                                                                            | Ovary-related diseases,<br>Testes-related diseases                 |

For each model, we report its name (NAME), its date of publication (DATE), its pubmed id (PUBMED ID), its main method applied in the model (METHOD), its dataset used in the model (DATASETS) and its case studies of diseases (CASE STUDIES).

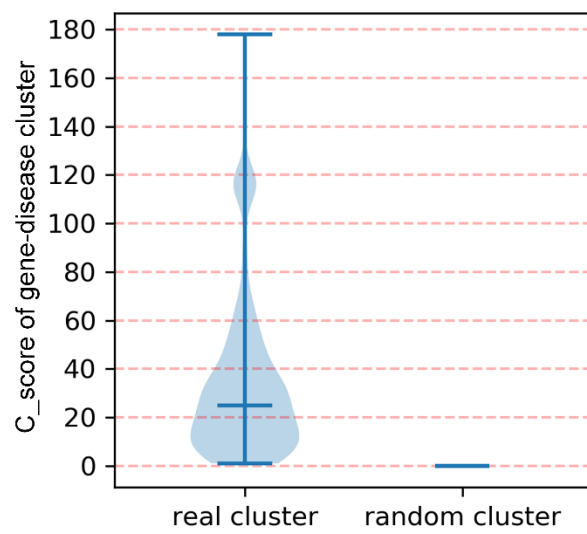

Fig. S1 Comparison of  $C\_score$  between real gene-disease clusters and random gene-disease cluster.
